# Supplementary material
Source: MDPI journal article supplement (https://www.mdpi.com/2071-1050/15/17/13086)
Supplement: s1 [file s1]

## Supplementary materials

### A. Criteria weighting

Tables SA.1-SA.12 are related to the weighting of indicators in section 5.1 of the article.

**Table SA.1. The average of experts' opinions comparing the best criterion to all criteria of the general dimension**

| Expert group | The best criterion | Economic |   |   | Social |   |     | Environmental |   |     |
|--------------|--------------------|----------|---|---|--------|---|-----|---------------|---|-----|
| 1            | Economic           | 1        | 1 | 1 | 2.5    | 3 | 3.5 | 3.5           | 4 | 4.5 |
| 2            |                    | 1        | 1 | 1 | 2.5    | 3 | 3.5 | 2.5           | 3 | 3.5 |
| 3            |                    | 1        | 1 | 1 | 0.67   | 1 | 1.5 | 1.5           | 2 | 2.5 |

**Table SA.2. The average of experts' opinions comparing the worst criterion to all criteria of the general dimension**

| Expert<br>Criterion |  | The worst criterion:<br>Environmental |   |     |
|---------------------|--|---------------------------------------|---|-----|
|                     |  | 1                                     | 2 | 3   |
| Economic            |  | 2.5                                   | 3 | 3.5 |
|                     |  | 1.5                                   | 2 | 2.5 |
|                     |  | 1.5                                   | 2 | 2.5 |
| Social              |  | 1                                     | 1 | 1   |
|                     |  | 1                                     | 1 | 1   |
|                     |  | 1                                     | 1 | 1   |
| Environmental       |  | 1                                     | 1 | 1   |
|                     |  | 1                                     | 1 | 1   |
|                     |  | 1.5                                   | 2 | 2.5 |

**Table SA.3. Weight and inconsistency rate of general criteria**

| Environmental        | Social  | Economic | Criterion |
|----------------------|---------|----------|-----------|
| 0.20897              | 0.24176 | 0.54925  | Weight    |
| <b>CR = 0.032435</b> |         |          |           |

**Table SA.4. The average of experts' opinions comparing the best criterion to all criteria of the economic dimension**

| Expert group | Best            | Investment cost |   |   | National Internal Rate of Return (IRR) |   |     | Reducing casualties and road accidents |   |     |
|--------------|-----------------|-----------------|---|---|----------------------------------------|---|-----|----------------------------------------|---|-----|
| 1            | Investment cost | 1               | 1 | 1 | 0.67                                   | 1 | 1.5 | 1                                      | 2 | 2.5 |
| 2            |                 | 1               | 1 | 1 | 0.67                                   | 1 | 1.5 | 2.5                                    | 3 | 3.5 |
| 3            |                 | 1               | 1 | 1 | 1                                      | 1 | 1   | 2.5                                    | 3 | 3.5 |

| Expert group | Best            | Strengthening the country's international status and transit |   |     | Internal rate of return (IRR) from the perspective of the private sector |   |     | Fuel consumption saving |   |     |
|--------------|-----------------|--------------------------------------------------------------|---|-----|--------------------------------------------------------------------------|---|-----|-------------------------|---|-----|
| 1            | Investment cost | 1                                                            | 2 | 2.5 | 2.5                                                                      | 3 | 3.5 | 1                       | 2 | 2.5 |
| 2            |                 | 2.5                                                          | 3 | 3.5 | 2.5                                                                      | 3 | 3.5 | 2.5                     | 3 | 3.5 |
| 3            |                 | 2.5                                                          | 3 | 3.5 | 3.5                                                                      | 4 | 4.5 | 2.5                     | 3 | 3.5 |
| Expert group | Best            | The amount of traffic (ton-kilometer)                        |   |     |                                                                          |   |     |                         |   |     |
| 1            | Investment cost | 1                                                            | 2 | 2.5 |                                                                          |   |     |                         |   |     |
| 2            |                 | 1                                                            | 2 | 2.5 |                                                                          |   |     |                         |   |     |
| 3            |                 | 1                                                            | 2 | 2.5 |                                                                          |   |     |                         |   |     |

**Table SA.5. The average of experts' opinions comparing the worst criterion to all criteria of the economic dimension**

|                                                                                   |  | The worst:<br>Internal rate of return (IRR)<br>from the perspective of the<br>private sector |   |     |
|-----------------------------------------------------------------------------------|--|----------------------------------------------------------------------------------------------|---|-----|
| Expert<br>Criterion                                                               |  | 1                                                                                            | 2 | 3   |
| Investment cost                                                                   |  | 2.5                                                                                          | 3 | 3.5 |
|                                                                                   |  | 2.5                                                                                          | 3 | 3.5 |
|                                                                                   |  | 3.5                                                                                          | 4 | 4.5 |
| National Internal<br>Rate of Return (IRR)                                         |  | 1                                                                                            | 2 | 2.5 |
|                                                                                   |  | 2.5                                                                                          | 3 | 3.5 |
|                                                                                   |  | 3.5                                                                                          | 4 | 4.5 |
| Reducing casualties<br>and road accidents                                         |  | 1                                                                                            | 1 | 1   |
|                                                                                   |  | 1                                                                                            | 2 | 2.5 |
|                                                                                   |  | 0.67                                                                                         | 1 | 1.5 |
| Strengthening the<br>country's<br>international status<br>and transit             |  | 1                                                                                            | 2 | 2.5 |
|                                                                                   |  | 1                                                                                            | 2 | 2.5 |
|                                                                                   |  | 1                                                                                            | 2 | 2.5 |
| Internal rate of<br>return (IRR) from<br>the perspective of<br>the private sector |  | 1                                                                                            | 1 | 1   |
|                                                                                   |  | 1                                                                                            | 1 | 1   |
|                                                                                   |  | 1                                                                                            | 1 | 1   |
| Fuel consumption<br>saving                                                        |  | 0.67                                                                                         | 1 | 1.5 |
|                                                                                   |  | 1                                                                                            | 2 | 2.5 |
|                                                                                   |  | 1                                                                                            | 1 | 1   |
|                                                                                   |  | 1                                                                                            | 2 | 2.5 |

|                       |   |   |     |
|-----------------------|---|---|-----|
| The amount of traffic | 1 | 2 | 2.5 |
|                       | 1 | 2 | 2.5 |

**Table SA.6. Weight and inconsistency rate of economic criteria**

| Criterion            | Investment cost | National Internal Rate of Return (IRR) | Reducing casualties and road accidents | Strengthening the country's international status and transit | Internal rate of return (IRR) from the perspective of the private sector | Fuel consumption saving | The amount of traffic ton-) (kilometer |
|----------------------|-----------------|----------------------------------------|----------------------------------------|--------------------------------------------------------------|--------------------------------------------------------------------------|-------------------------|----------------------------------------|
| <b>Weight</b>        | 0.26295         | 0.22775                                | 0.09613                                | 0.10106                                                      | 0.07169                                                                  | 0.10075                 | 0.13967                                |
| <b>CR = 0.003542</b> |                 |                                        |                                        |                                                              |                                                                          |                         |                                        |

**Table SA.7. The average of experts' opinions comparing the best criterion to all criteria of social dimension**

| Expert group | Best                                             | Creating social justice and removing deprivation |   |     | Providing employment, especially in deprived areas                               |   |     | The possibility of developing the plan to cover other regions of the country |   |     |
|--------------|--------------------------------------------------|--------------------------------------------------|---|-----|----------------------------------------------------------------------------------|---|-----|------------------------------------------------------------------------------|---|-----|
| 1            | Creating social justice and removing deprivation | 1                                                | 1 | 1   | 1                                                                                | 2 | 2.5 | 1                                                                            | 1 | 1   |
| 2            |                                                  | 1                                                | 1 | 1   | 2.5                                                                              | 3 | 3.5 | 1                                                                            | 2 | 2.5 |
| 3            |                                                  | 1                                                | 1 | 1   | 1                                                                                | 2 | 2.5 | 1                                                                            | 2 | 2.5 |
| Expert group | Best                                             | Facilitating people's rail travel                |   |     | Improving the correlation between the economic and social centers of the country |   |     |                                                                              |   |     |
| 1            | Creating social justice and removing deprivation | 1                                                | 1 | 1   | 1                                                                                | 1 | 1   |                                                                              |   |     |
| 2            |                                                  | 0.67                                             | 1 | 1.5 | 0.67                                                                             | 1 | 1.5 |                                                                              |   |     |
| 3            |                                                  | 0.67                                             | 1 | 1.5 | 1                                                                                | 1 | 1   |                                                                              |   |     |

**Table SA.8. The average of experts' opinions comparing the worst criterion to all criteria of social dimension**

|                                                    |           | Worth:<br>Providing employment, especially in deprived areas |   |     |
|----------------------------------------------------|-----------|--------------------------------------------------------------|---|-----|
| Expert                                             | Criterion | 1                                                            | 2 | 3   |
| Creating social justice and removing deprivation   |           | 1                                                            | 2 | 2.5 |
|                                                    |           | 2.5                                                          | 3 | 3.5 |
|                                                    |           | 1                                                            | 2 | 2.5 |
| Providing employment, especially in deprived areas |           | 1                                                            | 1 | 1   |
|                                                    |           | 1                                                            | 1 | 1   |
|                                                    |           | 1                                                            | 1 | 1   |
|                                                    |           | 0.67                                                         | 1 | 1.5 |

|                                                                                  |      |   |     |
|----------------------------------------------------------------------------------|------|---|-----|
| The possibility of developing the plan to cover other regions of the country     | 0.67 | 1 | 1.5 |
|                                                                                  | 1    | 2 | 2.5 |
| Facilitating people's rail travel                                                | 1    | 2 | 2.5 |
|                                                                                  | 0.67 | 1 | 1.5 |
|                                                                                  | 1    | 2 | 2.5 |
| Improving the correlation between the economic and social centers of the country | 1    | 2 | 2.5 |
|                                                                                  | 1    | 2 | 2.5 |
|                                                                                  | 1    | 2 | 2.5 |

**Table SA.9. Weight and inconsistency rate of social criteria**

| Criterion            | Creating social justice and removing deprivation | Providing employment, especially in deprived areas | The possibility of developing the plan to cover other regions of the country | Facilitating people's rail travel | Improving the correlation between the economic and social centers of the country |
|----------------------|--------------------------------------------------|----------------------------------------------------|------------------------------------------------------------------------------|-----------------------------------|----------------------------------------------------------------------------------|
| Weight               | 0.28659                                          | 0.12064                                            | 0.18764                                                                      | 0.19397                           | 0.21115                                                                          |
| <b>CR = 0.006541</b> |                                                  |                                                    |                                                                              |                                   |                                                                                  |

**Table SA.10. The average of experts' opinions comparing the best criterion to all criteria of environmental dimension**

| Expert group | Best                                                | Reducing environmental pollutants |   |     | Less effect on environmental change and destruction |   |   | Creating pollution in the implementation of the project |   |     |
|--------------|-----------------------------------------------------|-----------------------------------|---|-----|-----------------------------------------------------|---|---|---------------------------------------------------------|---|-----|
| 1            | Less effect on environmental change and destruction | 1                                 | 2 | 2.5 | 1                                                   | 1 | 1 | 1                                                       | 2 | 2.5 |
| 2            |                                                     | 1                                 | 1 | 1   | 1                                                   | 1 | 1 | 1                                                       | 1 | 1   |
| 3            |                                                     | 0.67                              | 1 | 1.5 | 1                                                   | 1 | 1 | 1                                                       | 2 | 2.5 |

**Table SA.11. The average of experts' opinions comparing the worst criterion to all criteria of environmental dimension**

|                                   |  | Worth:<br>Creating pollution in the implementation of the project |   |     |
|-----------------------------------|--|-------------------------------------------------------------------|---|-----|
| Expert \ Criterion                |  | 1                                                                 | 2 | 3   |
| Reducing environmental pollutants |  | 1                                                                 | 1 | 1   |
|                                   |  | 0.67                                                              | 1 | 1.5 |
|                                   |  | 1                                                                 | 1 | 1   |
|                                   |  | 1                                                                 | 2 | 2.5 |
|                                   |  | 1                                                                 | 2 | 2.5 |

|                                                         |      |   |     |
|---------------------------------------------------------|------|---|-----|
| Less effect on environmental change and destruction     | 0.67 | 1 | 1.5 |
| Creating pollution in the implementation of the project | 1    | 1 | 1   |
|                                                         | 1    | 1 | 1   |
|                                                         | 1    | 1 | 1   |

**Table SA.12. Weight and inconsistency rate of environmental criteria**

| Criterion            | Reducing environmental pollutants | Less effect on environmental change and destruction | Creating pollution in the implementation of the project |
|----------------------|-----------------------------------|-----------------------------------------------------|---------------------------------------------------------|
| Weight               | 0.31120                           | 0.43389                                             | 0.25492                                                 |
| <b>CR = 0.003547</b> |                                   |                                                     |                                                         |

## B. Stochastic VIKOR results in cost changes scenario

Tables SB.1-SB.5 are related to section 5.2.1 of the article.

**Table SB.1. Values of the normalized matrix of stochastic VIKOR decision making in the scenario of cost changes**

|     | S1-1     | S1-2     | S1-3     | S1-1      | S1-2      | S1-3      | S1-1     | S1-2     | S1-3     |
|-----|----------|----------|----------|-----------|-----------|-----------|----------|----------|----------|
|     | C1       |          |          | C2        |           |           | C3       |          |          |
| P1  | 0.091240 | 0.091240 | 0.091240 | 0.104690  | 0.106276  | 0.108042  | 0.066035 | 0.066035 | 0.066035 |
| P2  | 0.257428 | 0.257428 | 0.257428 | 0.133954  | 0.145532  | 0.158392  | 0.041877 | 0.041877 | 0.041877 |
| P3  | 0.048868 | 0.048868 | 0.048868 | 0.069120  | 0.064148  | 0.058546  | 0.073925 | 0.073925 | 0.073925 |
| P4  | 0.087369 | 0.087369 | 0.087369 | 0.143650  | 0.152492  | 0.162582  | 0.100670 | 0.100670 | 0.100670 |
| P5  | 0.145616 | 0.145616 | 0.145616 | 0.121666  | 0.125497  | 0.129866  | 0.049062 | 0.049062 | 0.049062 |
| P6  | 0.052422 | 0.052422 | 0.052422 | 0.068050  | 0.062164  | 0.055664  | 0.067129 | 0.067129 | 0.067129 |
| P7  | 0.035075 | 0.035075 | 0.035075 | -0.004977 | -0.020110 | -0.036699 | 0.021511 | 0.021511 | 0.021511 |
| P8  | 0.062952 | 0.062952 | 0.062952 | 0.103542  | 0.107973  | 0.112640  | 0.109402 | 0.109402 | 0.109402 |
| P9  | 0.161977 | 0.161977 | 0.161977 | 0.078913  | 0.076660  | 0.073952  | 0.027835 | 0.027835 | 0.027835 |
| P10 | 0.039388 | 0.039388 | 0.039388 | 0.064248  | 0.059606  | 0.054186  | 0.082206 | 0.082206 | 0.082206 |
| P11 | 0.017667 | 0.017667 | 0.017667 | 0.117146  | 0.119762  | 0.122830  | 0.360348 | 0.360348 | 0.360348 |
|     | C4       |          |          | C5        |           |           | C6       |          |          |
| P1  | 0.200557 | 0.200056 | 0.200557 | 0.000000  | 0.000000  | 0.000000  | 0.066035 | 0.066035 | 0.066035 |
| P2  | 0.050139 | 0.050014 | 0.050139 | 0.000000  | 0.000000  | 0.000000  | 0.041877 | 0.041877 | 0.041877 |
| P3  | 0.061281 | 0.061128 | 0.061281 | 0.000000  | 0.000000  | 0.000000  | 0.073925 | 0.073925 | 0.073925 |

|     |          |          |          |          |          |          |          |          |          |
|-----|----------|----------|----------|----------|----------|----------|----------|----------|----------|
| P4  | 0.200557 | 0.200056 | 0.200557 | 0.000000 | 0.000000 | 0.000000 | 0.100670 | 0.100670 | 0.100670 |
| P5  | 0.008357 | 0.010836 | 0.008357 | 0.000000 | 0.000000 | 0.000000 | 0.049062 | 0.049062 | 0.049062 |
| P6  | 0.006685 | 0.006669 | 0.006685 | 0.000000 | 0.000000 | 0.000000 | 0.067129 | 0.067129 | 0.067129 |
| P7  | 0.100279 | 0.100028 | 0.100279 | 0.000000 | 0.000000 | 0.000000 | 0.021511 | 0.021511 | 0.021511 |
| P8  | 0.094708 | 0.094471 | 0.094708 | 0.000000 | 0.000000 | 0.000000 | 0.109402 | 0.109402 | 0.109402 |
| P9  | 0.004457 | 0.004446 | 0.004457 | 0.000000 | 0.000000 | 0.000000 | 0.027835 | 0.027835 | 0.027835 |
| P10 | 0.200557 | 0.200056 | 0.200557 | 0.000000 | 0.000000 | 0.000000 | 0.082206 | 0.082206 | 0.082206 |
| P11 | 0.072423 | 0.072242 | 0.072423 | 0.000000 | 0.000000 | 0.000000 | 0.360348 | 0.360348 | 0.360348 |
|     | C7       |          |          | C8       |          |          | C9       |          |          |
| P1  | 0.023857 | 0.023857 | 0.023857 | 0.016667 | 0.016667 | 0.016667 | 0.036179 | 0.036179 | 0.036179 |
| P2  | 0.028322 | 0.028322 | 0.028322 | 0.083333 | 0.083333 | 0.083333 | 0.057887 | 0.057887 | 0.057887 |
| P3  | 0.073406 | 0.073406 | 0.073406 | 0.100000 | 0.100000 | 0.100000 | 0.100189 | 0.100189 | 0.100189 |
| P4  | 0.136648 | 0.136648 | 0.136648 | 0.166667 | 0.166667 | 0.166667 | 0.135367 | 0.135367 | 0.135367 |
| P5  | 0.017966 | 0.017966 | 0.017966 | 0.050000 | 0.050000 | 0.050000 | 0.037404 | 0.037404 | 0.037404 |
| P6  | 0.050025 | 0.050025 | 0.050025 | 0.066667 | 0.066667 | 0.066667 | 0.076812 | 0.076812 | 0.076812 |
| P7  | 0.025919 | 0.025919 | 0.025919 | 0.066667 | 0.066667 | 0.066667 | 0.122454 | 0.122454 | 0.122454 |
| P8  | 0.060900 | 0.060900 | 0.060900 | 0.083333 | 0.083333 | 0.083333 | 0.049872 | 0.049872 | 0.049872 |
| P9  | 0.020427 | 0.020427 | 0.020427 | 0.066667 | 0.066667 | 0.066667 | 0.071691 | 0.071691 | 0.071691 |
| P10 | 0.171282 | 0.171282 | 0.171282 | 0.166667 | 0.166667 | 0.166667 | 0.200378 | 0.200378 | 0.200378 |
| P11 | 0.391247 | 0.391247 | 0.391247 | 0.133333 | 0.133333 | 0.133333 | 0.111767 | 0.111767 | 0.111767 |
|     | C10      |          |          | C11      |          |          | C12      |          |          |
| P1  | 0.122807 | 0.122807 | 0.122807 | 0.021243 | 0.021243 | 0.021243 | 0.081967 | 0.081967 | 0.081967 |
| P2  | 0.105263 | 0.105263 | 0.105263 | 0.093469 | 0.093469 | 0.093469 | 0.081967 | 0.081967 | 0.081967 |
| P3  | 0.140351 | 0.140351 | 0.140351 | 0.102946 | 0.102946 | 0.102946 | 0.131148 | 0.131148 | 0.131148 |
| P4  | 0.105263 | 0.105263 | 0.105263 | 0.114254 | 0.114254 | 0.114254 | 0.131148 | 0.131148 | 0.131148 |
| P5  | 0.070175 | 0.070175 | 0.070175 | 0.008236 | 0.008236 | 0.008236 | 0.065574 | 0.065574 | 0.065574 |
| P6  | 0.105263 | 0.105263 | 0.105263 | 0.140938 | 0.140938 | 0.140938 | 0.098361 | 0.098361 | 0.098361 |
| P7  | 0.070175 | 0.070175 | 0.070175 | 0.062912 | 0.062912 | 0.062912 | 0.081967 | 0.081967 | 0.081967 |
| P8  | 0.035088 | 0.035088 | 0.035088 | 0.073206 | 0.073206 | 0.073206 | 0.065574 | 0.065574 | 0.065574 |
| P9  | 0.035088 | 0.035088 | 0.035088 | 0.034201 | 0.034201 | 0.034201 | 0.032787 | 0.032787 | 0.032787 |
| P10 | 0.122807 | 0.122807 | 0.122807 | 0.213246 | 0.213246 | 0.213246 | 0.114754 | 0.114754 | 0.114754 |
| P11 | 0.087719 | 0.087719 | 0.087719 | 0.135350 | 0.135350 | 0.135350 | 0.114754 | 0.114754 | 0.114754 |
|     | C13      |          |          | C14      |          |          | C15      |          |          |
| P1  | 0.066035 | 0.066035 | 0.066035 | 0.016667 | 0.016667 | 0.016667 | 0.035088 | 0.035088 | 0.035088 |

|     |          |          |          |          |          |          |          |          |          |
|-----|----------|----------|----------|----------|----------|----------|----------|----------|----------|
| P2  | 0.041877 | 0.041877 | 0.041877 | 0.100000 | 0.100000 | 0.100000 | 0.087719 | 0.087719 | 0.087719 |
| P3  | 0.073925 | 0.073925 | 0.073925 | 0.100000 | 0.100000 | 0.100000 | 0.087719 | 0.087719 | 0.087719 |
| P4  | 0.100670 | 0.100670 | 0.100670 | 0.150000 | 0.150000 | 0.150000 | 0.157895 | 0.157895 | 0.157895 |
| P5  | 0.049062 | 0.049062 | 0.049062 | 0.083333 | 0.083333 | 0.083333 | 0.087719 | 0.087719 | 0.087719 |
| P6  | 0.067129 | 0.067129 | 0.067129 | 0.083333 | 0.083333 | 0.083333 | 0.087719 | 0.087719 | 0.087719 |
| P7  | 0.021511 | 0.021511 | 0.021511 | 0.083333 | 0.083333 | 0.083333 | 0.070175 | 0.070175 | 0.070175 |
| P8  | 0.109402 | 0.109402 | 0.109402 | 0.066667 | 0.066667 | 0.066667 | 0.087719 | 0.087719 | 0.087719 |
| P9  | 0.027835 | 0.027835 | 0.027835 | 0.083333 | 0.083333 | 0.083333 | 0.070175 | 0.070175 | 0.070175 |
| P10 | 0.082206 | 0.082206 | 0.082206 | 0.150000 | 0.150000 | 0.150000 | 0.140351 | 0.140351 | 0.140351 |
| P11 | 0.360348 | 0.360348 | 0.360348 | 0.083333 | 0.083333 | 0.083333 | 0.087719 | 0.087719 | 0.087719 |

**Table SB.2. Values of the weighted normalization matrix of stochastic VIKOR decision making in the scenario of cost changes**

|     | S1-1     | S1-2     | S1-3     | S1-1      | S1-2      | S1-3      | S1-1     | S1-2     | S1-3     |
|-----|----------|----------|----------|-----------|-----------|-----------|----------|----------|----------|
|     | C1       |          |          | C2        |           |           | C3       |          |          |
| P1  | 0.001977 | 0.006589 | 0.004612 | 0.001964  | 0.006647  | 0.004730  | 0.000523 | 0.001743 | 0.001220 |
| P2  | 0.005577 | 0.018590 | 0.013013 | 0.002513  | 0.009102  | 0.006935  | 0.000332 | 0.001106 | 0.000774 |
| P3  | 0.001059 | 0.003529 | 0.002470 | 0.001297  | 0.004012  | 0.002563  | 0.000585 | 0.001952 | 0.001366 |
| P4  | 0.001893 | 0.006309 | 0.004417 | 0.002695  | 0.009538  | 0.007118  | 0.000797 | 0.002658 | 0.001860 |
| P5  | 0.003155 | 0.010516 | 0.007361 | 0.002283  | 0.007849  | 0.005686  | 0.000389 | 0.001295 | 0.000907 |
| P6  | 0.001136 | 0.003786 | 0.002650 | 0.001277  | 0.003888  | 0.002437  | 0.000532 | 0.001772 | 0.001241 |
| P7  | 0.000760 | 0.002533 | 0.001773 | -0.000093 | -0.001258 | -0.001607 | 0.000170 | 0.000568 | 0.000398 |
| P8  | 0.001364 | 0.004546 | 0.003182 | 0.001943  | 0.006753  | 0.004932  | 0.000866 | 0.002888 | 0.002022 |
| P9  | 0.003509 | 0.011697 | 0.008188 | 0.001481  | 0.004795  | 0.003238  | 0.000220 | 0.000735 | 0.000514 |
| P10 | 0.000853 | 0.002844 | 0.001991 | 0.001206  | 0.003728  | 0.002372  | 0.000651 | 0.002170 | 0.001519 |
| P11 | 0.000383 | 0.001276 | 0.000893 | 0.002198  | 0.007491  | 0.005378  | 0.002854 | 0.009513 | 0.006659 |
|     | C4       |          |          | C5        |           |           | C6       |          |          |
| P1  | 0.001670 | 0.005553 | 0.003897 | 0.000000  | 0.000000  | 0.000000  | 0.000548 | 0.001827 | 0.001279 |
| P2  | 0.000417 | 0.001388 | 0.000974 | 0.000000  | 0.000000  | 0.000000  | 0.000348 | 0.001159 | 0.000811 |
| P3  | 0.000510 | 0.001697 | 0.001191 | 0.000000  | 0.000000  | 0.000000  | 0.000614 | 0.002046 | 0.001432 |
| P4  | 0.001670 | 0.005553 | 0.003897 | 0.000000  | 0.000000  | 0.000000  | 0.000836 | 0.002786 | 0.001950 |
| P5  | 0.000070 | 0.000301 | 0.000162 | 0.000000  | 0.000000  | 0.000000  | 0.000407 | 0.001358 | 0.000950 |
| P6  | 0.000056 | 0.000185 | 0.000130 | 0.000000  | 0.000000  | 0.000000  | 0.000557 | 0.001857 | 0.001300 |
| P7  | 0.000835 | 0.002776 | 0.001948 | 0.000000  | 0.000000  | 0.000000  | 0.000179 | 0.000595 | 0.000417 |

|     |          |          |          |          |          |          |          |          |          |
|-----|----------|----------|----------|----------|----------|----------|----------|----------|----------|
| P8  | 0.000789 | 0.002622 | 0.001840 | 0.000000 | 0.000000 | 0.000000 | 0.000908 | 0.003027 | 0.002119 |
| P9  | 0.000037 | 0.000123 | 0.000087 | 0.000000 | 0.000000 | 0.000000 | 0.000231 | 0.000770 | 0.000539 |
| P10 | 0.001670 | 0.005553 | 0.003897 | 0.000000 | 0.000000 | 0.000000 | 0.000682 | 0.002275 | 0.001592 |
| P11 | 0.000603 | 0.002005 | 0.001407 | 0.000000 | 0.000000 | 0.000000 | 0.002991 | 0.009971 | 0.006980 |
|     | C7       |          |          | C8       |          |          | C9       |          |          |
| P1  | 0.000275 | 0.000915 | 0.000641 | 0.000173 | 0.000577 | 0.000404 | 0.000158 | 0.000528 | 0.000369 |
| P2  | 0.000326 | 0.001086 | 0.000760 | 0.000866 | 0.002887 | 0.002021 | 0.000253 | 0.000844 | 0.000591 |
| P3  | 0.000845 | 0.002816 | 0.001971 | 0.001039 | 0.003465 | 0.002425 | 0.000438 | 0.001461 | 0.001023 |
| P4  | 0.001572 | 0.005241 | 0.003669 | 0.001732 | 0.005774 | 0.004042 | 0.000592 | 0.001974 | 0.001382 |
| P5  | 0.000207 | 0.000689 | 0.000482 | 0.000520 | 0.001732 | 0.001213 | 0.000164 | 0.000546 | 0.000382 |
| P6  | 0.000576 | 0.001919 | 0.001343 | 0.000693 | 0.002310 | 0.001617 | 0.000336 | 0.001120 | 0.000784 |
| P7  | 0.000298 | 0.000994 | 0.000696 | 0.000693 | 0.002310 | 0.001617 | 0.000536 | 0.001786 | 0.001250 |
| P8  | 0.000701 | 0.002336 | 0.001635 | 0.000866 | 0.002887 | 0.002021 | 0.000218 | 0.000727 | 0.000509 |
| P9  | 0.000235 | 0.000783 | 0.000548 | 0.000693 | 0.002310 | 0.001617 | 0.000314 | 0.001046 | 0.000732 |
| P10 | 0.001971 | 0.006570 | 0.004599 | 0.001732 | 0.005774 | 0.004042 | 0.000877 | 0.002923 | 0.002046 |
| P11 | 0.004502 | 0.015006 | 0.010504 | 0.001386 | 0.004619 | 0.003234 | 0.000489 | 0.001630 | 0.001141 |
|     | C10      |          |          | C11      |          |          | C12      |          |          |
| P1  | 0.000836 | 0.002785 | 0.001950 | 0.000149 | 0.000498 | 0.000349 | 0.000628 | 0.002092 | 0.001465 |
| P2  | 0.000716 | 0.002387 | 0.001671 | 0.000657 | 0.002191 | 0.001534 | 0.000628 | 0.002092 | 0.001465 |
| P3  | 0.000955 | 0.003183 | 0.002228 | 0.000724 | 0.002414 | 0.001690 | 0.001004 | 0.003348 | 0.002343 |
| P4  | 0.000716 | 0.002387 | 0.001671 | 0.000804 | 0.002679 | 0.001875 | 0.001004 | 0.003348 | 0.002343 |
| P5  | 0.000477 | 0.001592 | 0.001114 | 0.000058 | 0.000193 | 0.000135 | 0.000502 | 0.001674 | 0.001172 |
| P6  | 0.000716 | 0.002387 | 0.001671 | 0.000991 | 0.003304 | 0.002313 | 0.000753 | 0.002511 | 0.001757 |
| P7  | 0.000477 | 0.001592 | 0.001114 | 0.000442 | 0.001475 | 0.001032 | 0.000628 | 0.002092 | 0.001465 |
| P8  | 0.000239 | 0.000796 | 0.000557 | 0.000515 | 0.001716 | 0.001201 | 0.000502 | 0.001674 | 0.001172 |
| P9  | 0.000239 | 0.000796 | 0.000557 | 0.000241 | 0.000802 | 0.000561 | 0.000251 | 0.000837 | 0.000586 |
| P10 | 0.000836 | 0.002785 | 0.001950 | 0.001500 | 0.005000 | 0.003500 | 0.000879 | 0.002929 | 0.002050 |
| P11 | 0.000597 | 0.001989 | 0.001393 | 0.000952 | 0.003173 | 0.002221 | 0.000879 | 0.002929 | 0.002050 |
|     | C13      |          |          | C14      |          |          | C15      |          |          |
| P1  | 0.000644 | 0.002147 | 0.001503 | 0.000227 | 0.000756 | 0.000529 | 0.001342 | 0.004472 | 0.003131 |
| P2  | 0.000408 | 0.001362 | 0.000953 | 0.001360 | 0.004534 | 0.003173 | 0.003354 | 0.011181 | 0.007826 |
| P3  | 0.000721 | 0.002404 | 0.001683 | 0.001360 | 0.004534 | 0.003173 | 0.003354 | 0.011181 | 0.007826 |
| P4  | 0.000982 | 0.003273 | 0.002291 | 0.002040 | 0.006800 | 0.004760 | 0.006038 | 0.020125 | 0.014088 |
| P5  | 0.000479 | 0.001595 | 0.001117 | 0.001133 | 0.003778 | 0.002645 | 0.003354 | 0.011181 | 0.007826 |



|     |          |          |          |          |          |          |          |          |          |
|-----|----------|----------|----------|----------|----------|----------|----------|----------|----------|
| P6  | 0.000655 | 0.002183 | 0.001528 | 0.001133 | 0.003778 | 0.002645 | 0.003354 | 0.011181 | 0.007826 |
| P7  | 0.000210 | 0.000699 | 0.000490 | 0.001133 | 0.003778 | 0.002645 | 0.002683 | 0.008945 | 0.006261 |
| P8  | 0.001067 | 0.003557 | 0.002490 | 0.000907 | 0.003022 | 0.002116 | 0.003354 | 0.011181 | 0.007826 |
| P9  | 0.000272 | 0.000905 | 0.000634 | 0.001133 | 0.003778 | 0.002645 | 0.002683 | 0.008945 | 0.006261 |
| P10 | 0.000802 | 0.002673 | 0.001871 | 0.002040 | 0.006800 | 0.004760 | 0.005367 | 0.017889 | 0.012522 |
| P11 | 0.003515 | 0.011717 | 0.008202 | 0.001133 | 0.003778 | 0.002645 | 0.003354 | 0.011181 | 0.007826 |

**Table SB.3.  $f^+$  and  $f^-$  values in the cost change scenario**

|       | S1-1     | S1-2     | S1-3     | S1-1      | S1-2      | S1-3      | S1-1     | S1-2     | S1-3     |
|-------|----------|----------|----------|-----------|-----------|-----------|----------|----------|----------|
|       | C1       |          |          | C2        |           |           | C3       |          |          |
| $f^+$ | 0.005577 | 0.018590 | 0.013013 | 0.002695  | 0.009538  | 0.007118  | 0.002854 | 0.009513 | 0.006659 |
| $f^-$ | 0.000383 | 0.001276 | 0.000893 | -0.000093 | -0.001258 | -0.001607 | 0.000170 | 0.000568 | 0.000398 |
|       | C4       |          |          | C5        |           |           | C6       |          |          |
| $f^+$ | 0.001670 | 0.005553 | 0.003897 | 0.000000  | 0.000000  | 0.000000  | 0.002991 | 0.009971 | 0.006980 |
| $f^-$ | 0.000037 | 0.000123 | 0.000087 | 0.000000  | 0.000000  | 0.000000  | 0.000179 | 0.000595 | 0.000417 |
|       | C7       |          |          | C8        |           |           | C9       |          |          |
| $f^+$ | 0.004502 | 0.015006 | 0.010504 | 0.001732  | 0.005774  | 0.004042  | 0.000877 | 0.002923 | 0.002046 |
| $f^-$ | 0.000207 | 0.000689 | 0.000482 | 0.000173  | 0.000577  | 0.000404  | 0.000158 | 0.000528 | 0.000369 |
|       | C10      |          |          | C11       |           |           | C12      |          |          |
| $f^+$ | 0.000955 | 0.003183 | 0.002228 | 0.001500  | 0.005000  | 0.003500  | 0.001004 | 0.003348 | 0.002343 |
| $f^-$ | 0.000239 | 0.000796 | 0.000557 | 0.000058  | 0.000193  | 0.000135  | 0.000251 | 0.000837 | 0.000586 |
|       | C13      |          |          | C14       |           |           | C15      |          |          |
| $f^+$ | 0.003515 | 0.011717 | 0.008202 | 0.002040  | 0.006800  | 0.004760  | 0.006038 | 0.020125 | 0.014088 |
| $f^-$ | 0.000210 | 0.000699 | 0.000490 | 0.000227  | 0.000756  | 0.000529  | 0.001342 | 0.004472 | 0.003131 |

**Table SB.4. Utility values of plans in the scenario of cost changes**

|     | Ljs    |        |        | SSj      |
|-----|--------|--------|--------|----------|
| P1  | 10.937 | 10.952 | 10.963 | 10.95367 |
| P2  | 9.079  | 9.062  | 9.048  | 9.059603 |
| P3  | 8.773  | 8.794  | 8.810  | 8.796632 |
| P4  | 4.903  | 4.903  | 4.903  | 4.902601 |
| P5  | 11.434 | 11.433 | 11.458 | 11.44181 |
| P6  | 10.249 | 10.271 | 10.287 | 10.27323 |
| P7  | 11.638 | 11.640 | 11.641 | 11.64007 |
| P8  | 10.472 | 10.470 | 10.469 | 10.4702  |
| P9  | 12.309 | 12.313 | 12.318 | 12.31422 |
| P10 | 5.363  | 5.378  | 5.391  | 5.380227 |
| P11 | 5.167  | 5.194  | 5.214  | 5.197128 |

**Table SB.5. The regret values of the plans in the scenario of cost**

|     | changes     |             |             |          |
|-----|-------------|-------------|-------------|----------|
|     | Tjs         |             |             | Rj       |
| P1  | 1           | 1           | 1           | 1        |
| P2  | 0.972255132 | 0.972255132 | 0.972255132 | 0.972255 |
| P3  | 0.869866191 | 0.869866191 | 0.869866191 | 0.869866 |
| P4  | 0.766377996 | 0.766377996 | 0.766377996 | 0.766378 |
| P5  | 1           | 1           | 1           | 1        |
| P6  | 0.988636364 | 0.988636364 | 0.988636364 | 0.988636 |
| P7  | 1           | 1           | 1           | 1        |
| P8  | 1           | 1           | 1           | 1        |
| P9  | 1           | 1           | 1           | 1        |
| P10 | 0.909404659 | 0.909404659 | 0.909404659 | 0.909405 |
| P11 | 1           | 1           | 1           | 1        |

### C. Stochastic VIKOR results in demand changes scenario

Tables SC.1-SC.5 are related to section 5.2.2 of the article.

**Table SC.1. Values of the normalized matrix of stochastic VIKOR decision making in the scenario of demand changes**

|     | S2-1     | S2-2     | S2-3     | S2-1      | S2-2      | S2-3      | S2-1     | S2-2     | S2-3     |
|-----|----------|----------|----------|-----------|-----------|-----------|----------|----------|----------|
|     | C1       |          |          | C2        |           |           | C3       |          |          |
| P1  | 0.090288 | 0.090288 | 0.090288 | 0.109375  | 0.108042  | 0.104849  | 0.063989 | 0.063989 | 0.063989 |
| P2  | 0.254743 | 0.254743 | 0.254743 | 0.164653  | 0.158392  | 0.136571  | 0.040580 | 0.040580 | 0.040580 |
| P3  | 0.054282 | 0.054282 | 0.054282 | 0.055681  | 0.058546  | 0.068048  | 0.082116 | 0.082116 | 0.082116 |
| P4  | 0.086458 | 0.086458 | 0.086458 | 0.167748  | 0.162582  | 0.145538  | 0.119755 | 0.119755 | 0.119755 |
| P5  | 0.144097 | 0.144097 | 0.144097 | 0.132566  | 0.129866  | 0.122326  | 0.047542 | 0.047542 | 0.047542 |
| P6  | 0.051875 | 0.051875 | 0.051875 | 0.052469  | 0.055664  | 0.066729  | 0.065048 | 0.065048 | 0.065048 |
| P7  | 0.039216 | 0.039216 | 0.039216 | -0.045772 | -0.036699 | -0.007982 | 0.019149 | 0.019149 | 0.019149 |
| P8  | 0.062295 | 0.062295 | 0.062295 | 0.115378  | 0.112640  | 0.104349  | 0.106011 | 0.106011 | 0.106011 |
| P9  | 0.160287 | 0.160287 | 0.160287 | 0.071850  | 0.073952  | 0.078712  | 0.026972 | 0.026972 | 0.026972 |
| P10 | 0.038977 | 0.038977 | 0.038977 | 0.050972  | 0.054186  | 0.063431  | 0.079658 | 0.079658 | 0.079658 |
| P11 | 0.017482 | 0.017482 | 0.017482 | 0.125080  | 0.122830  | 0.117427  | 0.349180 | 0.349180 | 0.349180 |
|     | C4       |          |          | C5        |           |           | C6       |          |          |

|     |          |          |          |          |          |          |          |          |          |
|-----|----------|----------|----------|----------|----------|----------|----------|----------|----------|
| P1  | 0.194106 | 0.195461 | 0.195461 | 0.094505 | 0.096525 | 0.102423 | 0.065264 | 0.065264 | 0.065264 |
| P2  | 0.048526 | 0.048865 | 0.048865 | 0.093587 | 0.090009 | 0.085370 | 0.041388 | 0.041388 | 0.041388 |
| P3  | 0.061034 | 0.061460 | 0.061460 | 0.094198 | 0.095378 | 0.099417 | 0.075134 | 0.075134 | 0.075134 |
| P4  | 0.212914 | 0.214401 | 0.214401 | 0.060077 | 0.053982 | 0.022949 | 0.108904 | 0.108904 | 0.108904 |
| P5  | 0.015020 | 0.008144 | 0.008144 | 0.100410 | 0.102518 | 0.112738 | 0.048489 | 0.048489 | 0.048489 |
| P6  | 0.006470 | 0.006515 | 0.006515 | 0.098717 | 0.100953 | 0.110457 | 0.066344 | 0.066344 | 0.066344 |
| P7  | 0.101755 | 0.102465 | 0.102465 | 0.102605 | 0.105257 | 0.118658 | 0.021460 | 0.021460 | 0.021460 |
| P8  | 0.091661 | 0.092301 | 0.092301 | 0.091587 | 0.093301 | 0.096567 | 0.108124 | 0.108124 | 0.108124 |
| P9  | 0.004313 | 0.004344 | 0.004344 | 0.107383 | 0.106944 | 0.118058 | 0.027510 | 0.027510 | 0.027510 |
| P10 | 0.194106 | 0.195461 | 0.195461 | 0.077967 | 0.075668 | 0.062205 | 0.081245 | 0.081245 | 0.081245 |
| P11 | 0.070094 | 0.070583 | 0.070583 | 0.078965 | 0.079465 | 0.071158 | 0.356138 | 0.356138 | 0.356138 |
|     | C7       |          |          | C8       |          |          | C9       |          |          |
| P1  | 0.088751 | 0.088751 | 0.088751 | 0.016667 | 0.016667 | 0.016667 | 0.036179 | 0.036179 | 0.036179 |
| P2  | 0.105362 | 0.105362 | 0.105362 | 0.083333 | 0.083333 | 0.083333 | 0.057887 | 0.057887 | 0.057887 |
| P3  | 0.273080 | 0.273080 | 0.273080 | 0.100000 | 0.100000 | 0.100000 | 0.100189 | 0.100189 | 0.100189 |
| P4  | 0.508346 | 0.508346 | 0.508346 | 0.166667 | 0.166667 | 0.166667 | 0.135367 | 0.135367 | 0.135367 |
| P5  | 0.000596 | 0.000596 | 0.000596 | 0.050000 | 0.050000 | 0.050000 | 0.037404 | 0.037404 | 0.037404 |
| P6  | 0.001659 | 0.001659 | 0.001659 | 0.066667 | 0.066667 | 0.066667 | 0.076812 | 0.076812 | 0.076812 |
| P7  | 0.000859 | 0.000859 | 0.000859 | 0.066667 | 0.066667 | 0.066667 | 0.122454 | 0.122454 | 0.122454 |
| P8  | 0.002019 | 0.002019 | 0.002019 | 0.083333 | 0.083333 | 0.083333 | 0.049872 | 0.049872 | 0.049872 |
| P9  | 0.000677 | 0.000677 | 0.000677 | 0.066667 | 0.066667 | 0.066667 | 0.071691 | 0.071691 | 0.071691 |
| P10 | 0.005679 | 0.005679 | 0.005679 | 0.166667 | 0.166667 | 0.166667 | 0.200378 | 0.200378 | 0.200378 |
| P11 | 0.012972 | 0.012972 | 0.012972 | 0.133333 | 0.133333 | 0.133333 | 0.111767 | 0.111767 | 0.111767 |
|     | C10      |          |          | C11      |          |          | C12      |          |          |
| P1  | 0.122807 | 0.122807 | 0.122807 | 0.021243 | 0.021243 | 0.021243 | 0.081967 | 0.081967 | 0.081967 |
| P2  | 0.105263 | 0.105263 | 0.105263 | 0.093469 | 0.093469 | 0.093469 | 0.081967 | 0.081967 | 0.081967 |
| P3  | 0.140351 | 0.140351 | 0.140351 | 0.102946 | 0.102946 | 0.102946 | 0.131148 | 0.131148 | 0.131148 |
| P4  | 0.105263 | 0.105263 | 0.105263 | 0.114254 | 0.114254 | 0.114254 | 0.131148 | 0.131148 | 0.131148 |
| P5  | 0.070175 | 0.070175 | 0.070175 | 0.008236 | 0.008236 | 0.008236 | 0.065574 | 0.065574 | 0.065574 |
| P6  | 0.105263 | 0.105263 | 0.105263 | 0.140938 | 0.140938 | 0.140938 | 0.098361 | 0.098361 | 0.098361 |
| P7  | 0.070175 | 0.070175 | 0.070175 | 0.062912 | 0.062912 | 0.062912 | 0.081967 | 0.081967 | 0.081967 |
| P8  | 0.035088 | 0.035088 | 0.035088 | 0.073206 | 0.073206 | 0.073206 | 0.065574 | 0.065574 | 0.065574 |
| P9  | 0.035088 | 0.035088 | 0.035088 | 0.034201 | 0.034201 | 0.034201 | 0.032787 | 0.032787 | 0.032787 |
| P10 | 0.122807 | 0.122807 | 0.122807 | 0.213246 | 0.213246 | 0.213246 | 0.114754 | 0.114754 | 0.114754 |

|     |          |          |          |          |          |          |          |          |          |
|-----|----------|----------|----------|----------|----------|----------|----------|----------|----------|
| P11 | 0.087719 | 0.087719 | 0.087719 | 0.135350 | 0.135350 | 0.135350 | 0.114754 | 0.114754 | 0.114754 |
|     | C13      |          |          | C14      |          |          | C15      |          |          |
| P1  | 0.065377 | 0.065377 | 0.065377 | 0.016667 | 0.016667 | 0.016667 | 0.035088 | 0.035088 | 0.035088 |
| P2  | 0.041460 | 0.041460 | 0.041460 | 0.100000 | 0.100000 | 0.100000 | 0.087719 | 0.087719 | 0.087719 |
| P3  | 0.075573 | 0.075573 | 0.075573 | 0.100000 | 0.100000 | 0.100000 | 0.087719 | 0.087719 | 0.087719 |
| P4  | 0.107243 | 0.107243 | 0.107243 | 0.150000 | 0.150000 | 0.150000 | 0.157895 | 0.157895 | 0.157895 |
| P5  | 0.048574 | 0.048574 | 0.048574 | 0.083333 | 0.083333 | 0.083333 | 0.087719 | 0.087719 | 0.087719 |
| P6  | 0.066460 | 0.066460 | 0.066460 | 0.083333 | 0.083333 | 0.083333 | 0.087719 | 0.087719 | 0.087719 |
| P7  | 0.021296 | 0.021296 | 0.021296 | 0.083333 | 0.083333 | 0.083333 | 0.070175 | 0.070175 | 0.070175 |
| P8  | 0.108312 | 0.108312 | 0.108312 | 0.066667 | 0.066667 | 0.066667 | 0.087719 | 0.087719 | 0.087719 |
| P9  | 0.027558 | 0.027558 | 0.027558 | 0.083333 | 0.083333 | 0.083333 | 0.070175 | 0.070175 | 0.070175 |
| P10 | 0.081387 | 0.081387 | 0.081387 | 0.150000 | 0.150000 | 0.150000 | 0.140351 | 0.140351 | 0.140351 |
| P11 | 0.356759 | 0.356759 | 0.356759 | 0.083333 | 0.083333 | 0.083333 | 0.087719 | 0.087719 | 0.087719 |

**Table SC.2. Values of the weighted normalization matrix of stochastic VIKOR decision making in the scenario of demand changes**

|     |          |          |          |           |           |           |          |          |          |
|-----|----------|----------|----------|-----------|-----------|-----------|----------|----------|----------|
|     | S2-1     | S2-2     | S2-3     | S2-1      | S2-2      | S2-3      | S2-1     | S2-2     | S2-3     |
|     | C1       |          |          | C2        |           |           | C3       |          |          |
| P1  | 0.003260 | 0.006520 | 0.003260 | 0.003420  | 0.006757  | 0.003279  | 0.000845 | 0.001689 | 0.000845 |
| P2  | 0.009198 | 0.018396 | 0.009198 | 0.005149  | 0.009907  | 0.004271  | 0.000536 | 0.001071 | 0.000536 |
| P3  | 0.001960 | 0.003920 | 0.001960 | 0.001741  | 0.003662  | 0.002128  | 0.001084 | 0.002168 | 0.001084 |
| P4  | 0.003122 | 0.006244 | 0.003122 | 0.005246  | 0.010169  | 0.004551  | 0.001581 | 0.003162 | 0.001581 |
| P5  | 0.005203 | 0.010406 | 0.005203 | 0.004146  | 0.008122  | 0.003825  | 0.000628 | 0.001255 | 0.000628 |
| P6  | 0.001873 | 0.003746 | 0.001873 | 0.001641  | 0.003482  | 0.002087  | 0.000859 | 0.001717 | 0.000859 |
| P7  | 0.001416 | 0.002832 | 0.001416 | -0.001431 | -0.002295 | -0.000250 | 0.000253 | 0.000506 | 0.000253 |
| P8  | 0.002249 | 0.004499 | 0.002249 | 0.003608  | 0.007045  | 0.003263  | 0.001399 | 0.002799 | 0.001399 |
| P9  | 0.005788 | 0.011575 | 0.005788 | 0.002247  | 0.004625  | 0.002462  | 0.000356 | 0.000712 | 0.000356 |
| P10 | 0.001407 | 0.002815 | 0.001407 | 0.001594  | 0.003389  | 0.001984  | 0.001051 | 0.002103 | 0.001051 |
| P11 | 0.000631 | 0.001262 | 0.000631 | 0.003912  | 0.007682  | 0.003672  | 0.004609 | 0.009218 | 0.004609 |
|     | C4       |          |          | C5        |           |           | C6       |          |          |
| P1  | 0.002694 | 0.005425 | 0.002713 | 0.000930  | 0.001901  | 0.001008  | 0.000903 | 0.001806 | 0.000903 |
| P2  | 0.000673 | 0.001356 | 0.000678 | 0.000921  | 0.001772  | 0.000840  | 0.000573 | 0.001145 | 0.000573 |
| P3  | 0.000847 | 0.001706 | 0.000853 | 0.000927  | 0.001878  | 0.000979  | 0.001039 | 0.002079 | 0.001039 |
| P4  | 0.002955 | 0.005951 | 0.002975 | 0.000591  | 0.001063  | 0.000226  | 0.001507 | 0.003013 | 0.001507 |
| P5  | 0.000208 | 0.000226 | 0.000113 | 0.000989  | 0.002019  | 0.001110  | 0.000671 | 0.001342 | 0.000671 |

|     |          |          |          |          |          |          |          |          |          |
|-----|----------|----------|----------|----------|----------|----------|----------|----------|----------|
| P6  | 0.000090 | 0.000181 | 0.000090 | 0.000972 | 0.001988 | 0.001087 | 0.000918 | 0.001836 | 0.000918 |
| P7  | 0.001412 | 0.002844 | 0.001422 | 0.001010 | 0.002073 | 0.001168 | 0.000297 | 0.000594 | 0.000297 |
| P8  | 0.001272 | 0.002562 | 0.001281 | 0.000902 | 0.001837 | 0.000951 | 0.001496 | 0.002992 | 0.001496 |
| P9  | 0.000060 | 0.000121 | 0.000060 | 0.001057 | 0.002106 | 0.001162 | 0.000381 | 0.000761 | 0.000381 |
| P10 | 0.002694 | 0.005425 | 0.002713 | 0.000768 | 0.001490 | 0.000612 | 0.001124 | 0.002248 | 0.001124 |
| P11 | 0.000973 | 0.001959 | 0.000980 | 0.000777 | 0.001565 | 0.000701 | 0.004927 | 0.009854 | 0.004927 |
|     | C7       |          |          | C8       |          |          | C9       |          |          |
| P1  | 0.001702 | 0.003404 | 0.001702 | 0.000289 | 0.000577 | 0.000289 | 0.000264 | 0.000528 | 0.000264 |
| P2  | 0.002021 | 0.004041 | 0.002021 | 0.001444 | 0.002887 | 0.001444 | 0.000422 | 0.000844 | 0.000422 |
| P3  | 0.005237 | 0.010474 | 0.005237 | 0.001732 | 0.003465 | 0.001732 | 0.000731 | 0.001461 | 0.000731 |
| P4  | 0.009749 | 0.019498 | 0.009749 | 0.002887 | 0.005774 | 0.002887 | 0.000987 | 0.001974 | 0.000987 |
| P5  | 0.000011 | 0.000023 | 0.000011 | 0.000866 | 0.001732 | 0.000866 | 0.000273 | 0.000546 | 0.000273 |
| P6  | 0.000032 | 0.000064 | 0.000032 | 0.001155 | 0.002310 | 0.001155 | 0.000560 | 0.001120 | 0.000560 |
| P7  | 0.000016 | 0.000033 | 0.000016 | 0.001155 | 0.002310 | 0.001155 | 0.000893 | 0.001786 | 0.000893 |
| P8  | 0.000039 | 0.000077 | 0.000039 | 0.001444 | 0.002887 | 0.001444 | 0.000364 | 0.000727 | 0.000364 |
| P9  | 0.000013 | 0.000026 | 0.000013 | 0.001155 | 0.002310 | 0.001155 | 0.000523 | 0.001046 | 0.000523 |
| P10 | 0.000109 | 0.000218 | 0.000109 | 0.002887 | 0.005774 | 0.002887 | 0.001461 | 0.002923 | 0.001461 |
| P11 | 0.000249 | 0.000498 | 0.000249 | 0.002310 | 0.004619 | 0.002310 | 0.000815 | 0.001630 | 0.000815 |
|     | C10      |          |          | C11      |          |          | C12      |          |          |
| P1  | 0.001393 | 0.002785 | 0.001393 | 0.000249 | 0.000498 | 0.000249 | 0.001046 | 0.002092 | 0.001046 |
| P2  | 0.001194 | 0.002387 | 0.001194 | 0.001096 | 0.002191 | 0.001096 | 0.001046 | 0.002092 | 0.001046 |
| P3  | 0.001592 | 0.003183 | 0.001592 | 0.001207 | 0.002414 | 0.001207 | 0.001674 | 0.003348 | 0.001674 |
| P4  | 0.001194 | 0.002387 | 0.001194 | 0.001339 | 0.002679 | 0.001339 | 0.001674 | 0.003348 | 0.001674 |
| P5  | 0.000796 | 0.001592 | 0.000796 | 0.000097 | 0.000193 | 0.000097 | 0.000837 | 0.001674 | 0.000837 |
| P6  | 0.001194 | 0.002387 | 0.001194 | 0.001652 | 0.003304 | 0.001652 | 0.001255 | 0.002511 | 0.001255 |
| P7  | 0.000796 | 0.001592 | 0.000796 | 0.000737 | 0.001475 | 0.000737 | 0.001046 | 0.002092 | 0.001046 |
| P8  | 0.000398 | 0.000796 | 0.000398 | 0.000858 | 0.001716 | 0.000858 | 0.000837 | 0.001674 | 0.000837 |
| P9  | 0.000398 | 0.000796 | 0.000398 | 0.000401 | 0.000802 | 0.000401 | 0.000418 | 0.000837 | 0.000418 |
| P10 | 0.001393 | 0.002785 | 0.001393 | 0.002500 | 0.005000 | 0.002500 | 0.001465 | 0.002929 | 0.001465 |
| P11 | 0.000995 | 0.001989 | 0.000995 | 0.001587 | 0.003173 | 0.001587 | 0.001465 | 0.002929 | 0.001465 |
|     | C13      |          |          | C14      |          |          | C15      |          |          |
| P1  | 0.001063 | 0.002126 | 0.001063 | 0.000378 | 0.000756 | 0.000378 | 0.002236 | 0.004472 | 0.002236 |
| P2  | 0.000674 | 0.001348 | 0.000674 | 0.002267 | 0.004534 | 0.002267 | 0.005590 | 0.011181 | 0.005590 |
| P3  | 0.001229 | 0.002457 | 0.001229 | 0.002267 | 0.004534 | 0.002267 | 0.005590 | 0.011181 | 0.005590 |

|     |          |          |          |          |          |          |          |          |          |
|-----|----------|----------|----------|----------|----------|----------|----------|----------|----------|
| P4  | 0.001744 | 0.003487 | 0.001744 | 0.003400 | 0.006800 | 0.003400 | 0.010063 | 0.020125 | 0.010063 |
| P5  | 0.000790 | 0.001579 | 0.000790 | 0.001889 | 0.003778 | 0.001889 | 0.005590 | 0.011181 | 0.005590 |
| P6  | 0.001080 | 0.002161 | 0.001080 | 0.001889 | 0.003778 | 0.001889 | 0.005590 | 0.011181 | 0.005590 |
| P7  | 0.000346 | 0.000692 | 0.000346 | 0.001889 | 0.003778 | 0.001889 | 0.004472 | 0.008945 | 0.004472 |
| P8  | 0.001761 | 0.003522 | 0.001761 | 0.001511 | 0.003022 | 0.001511 | 0.005590 | 0.011181 | 0.005590 |
| P9  | 0.000448 | 0.000896 | 0.000448 | 0.001889 | 0.003778 | 0.001889 | 0.004472 | 0.008945 | 0.004472 |
| P10 | 0.001323 | 0.002646 | 0.001323 | 0.003400 | 0.006800 | 0.003400 | 0.008945 | 0.017889 | 0.008945 |
| P11 | 0.005800 | 0.011600 | 0.005800 | 0.001889 | 0.003778 | 0.001889 | 0.005590 | 0.011181 | 0.005590 |

**Table SC.3.  $f^+$  and  $f^-$  values in the demand change scenario**

|       | S2-1     | S2-2     | S2-3     | S2-1      | S2-2      | S2-3      | S2-1     | S2-2     | S2-3     |
|-------|----------|----------|----------|-----------|-----------|-----------|----------|----------|----------|
|       | C1       |          |          | C2        |           |           | C3       |          |          |
| $f^+$ | 0.009198 | 0.018396 | 0.009198 | 0.005246  | 0.010169  | 0.004551  | 0.004609 | 0.009218 | 0.004609 |
| $f^-$ | 0.000631 | 0.001262 | 0.000631 | -0.001431 | -0.002295 | -0.000250 | 0.000253 | 0.000506 | 0.000253 |
|       | C4       |          |          | C5        |           |           | C6       |          |          |
| $f^+$ | 0.002955 | 0.005951 | 0.002975 | 0.001057  | 0.002106  | 0.001168  | 0.004927 | 0.009854 | 0.004927 |
| $f^-$ | 0.000060 | 0.000121 | 0.000060 | 0.000591  | 0.001063  | 0.000226  | 0.000297 | 0.000594 | 0.000297 |
|       | C7       |          |          | C8        |           |           | C9       |          |          |
| $f^+$ | 0.009749 | 0.019498 | 0.009749 | 0.002887  | 0.005774  | 0.002887  | 0.001461 | 0.002923 | 0.001461 |
| $f^-$ | 0.000011 | 0.000023 | 0.000011 | 0.000289  | 0.000577  | 0.000289  | 0.000264 | 0.000528 | 0.000264 |
|       | C10      |          |          | C11       |           |           | C12      |          |          |
| $f^+$ | 0.001592 | 0.003183 | 0.001592 | 0.002500  | 0.005000  | 0.002500  | 0.001674 | 0.003348 | 0.001674 |
| $f^-$ | 0.000398 | 0.000796 | 0.000398 | 0.000097  | 0.000193  | 0.000097  | 0.000418 | 0.000837 | 0.000418 |
|       | C13      |          |          | C14       |           |           | C15      |          |          |
| $f^+$ | 0.005800 | 0.011600 | 0.005800 | 0.003400  | 0.006800  | 0.003400  | 0.010063 | 0.020125 | 0.010063 |
| $f^-$ | 0.000346 | 0.000692 | 0.000346 | 0.000378  | 0.000756  | 0.000378  | 0.002236 | 0.004472 | 0.002236 |

**Table SC.4. Utility values of plans in the scenario of demand changes**

|     | Ljs    |        |        | SSj      |
|-----|--------|--------|--------|----------|
| P1  | 10.360 | 10.285 | 10.249 | 10.29503 |
| P2  | 8.491  | 8.525  | 8.591  | 8.532971 |
| P3  | 7.866  | 7.803  | 7.768  | 7.810002 |
| P4  | 5.099  | 5.099  | 5.099  | 5.099094 |
| P5  | 10.654 | 10.623 | 10.588 | 10.62211 |
| P6  | 9.668  | 9.594  | 9.544  | 9.600151 |
| P7  | 10.797 | 10.728 | 10.696 | 10.73743 |
| P8  | 10.206 | 10.135 | 10.126 | 10.15009 |
| P9  | 11.325 | 11.320 | 11.317 | 11.32057 |
| P10 | 6.093  | 6.059  | 6.049  | 6.065232 |
| P11 | 6.341  | 6.259  | 6.220  | 6.269373 |

**Table SC.5. The regret values of the plans in the scenario of demand changes**

|     | Tjs         |             |             | Rj       |
|-----|-------------|-------------|-------------|----------|
| P1  | 1           | 1           | 1           | 1        |
| P2  | 0.940456316 | 0.940456316 | 0.940456316 | 0.940456 |
| P3  | 0.84489932  | 0.84489932  | 0.84489932  | 0.844899 |
| P4  | 1           | 1           | 1           | 1        |
| P5  | 1           | 1           | 1           | 1        |
| P6  | 0.997906474 | 0.997906474 | 0.997906474 | 0.997906 |
| P7  | 1           | 1           | 1           | 1        |
| P8  | 1           | 1           | 1           | 1        |
| P9  | 1           | 1           | 1           | 1        |
| P10 | 0.989988288 | 0.989988288 | 0.989988288 | 0.989988 |
| P11 | 1           | 1           | 1           | 1        |
